# Supplementary material
Source: Royal Society of Chemistry journal article supplement (doi:10.1039/d6cc02410f)
Supplement: d6cc02410f1.pdf [file d6cc02410f1.pdf]

## Electronic Supplementary Information

### **Bimetallic Metal-Organic Frameworks enable tandem catalysis for Efficient Electrocatalytic Nitrate Reduction and Zn-NO<sub>3</sub><sup>-</sup> Batteries**

*Long Lin, Tang Wang, Yu Zhou, Men Du, Rui Li, and Wang Zhang\**

*College of Materials Science and Engineering, College of Environment, State Key Laboratory of Advanced Separation Membrane Materials, Zhejiang Key Laboratory of Low-carbon Control Technology for Industrial Pollution, Zhejiang University of Technology, Hangzhou 310014, China.*

*E-mail:*

*zhangwang@zjut.edu.cn*

## Materials

Copper nitrate hexahydrate ( $\text{Cu}(\text{NO}_3)_2 \cdot 3\text{H}_2\text{O}$ , >99.0%), Nickel nitrate hexahydrate ( $\text{Ni}(\text{NO}_3)_2 \cdot 6\text{H}_2\text{O}$ , >99.0%), Cobalt nitrate hexahydrate ( $\text{Co}(\text{NO}_3)_2 \cdot 6\text{H}_2\text{O}$ , >99.0%), Ferrous chloride tetrahydrate ( $\text{FeCl}_2 \cdot 4\text{H}_2\text{O}$ , >99.0%), polyvinylpyrrolidone (PVP, F.W. GR), N,N-dimethylformamide (DMF), Ethanol (EtOH), potassium hydroxide (KOH, 85%), hydrochloric acid (HCl, 12 mol/L), salicylic acid ( $\text{C}_7\text{H}_6\text{O}_3$ ), trisodium citrate dihydrate ( $\text{C}_6\text{H}_5\text{Na}_3\text{O}_7 \cdot 2\text{H}_2\text{O}$ ) were purchased from Sinopharm Chemical Reagent Co. Ltd. 2,6-Naphthalene dicarboxylic acid ( $\text{C}_{12}\text{H}_8\text{O}_4$  (NDC), >99.0%), Sodium hydroxide (NaOH), Phosphoric acid (>99.99%), sodium hypochlorite solution (NaClO, 0.1M) were purchased from Macklin Co. Ltd. Potassium nitrate ( $\text{KNO}_3$ , 99%), potassium nitrate- $^{15}\text{N}$  ( $\text{K}^{15}\text{NO}_3$ , 99%), ammonium chloride- $^{15}\text{N}$  ( $^{15}\text{NH}_4\text{Cl}$ ), sulfamic acid, sodium nitroferricyanide dihydrate ( $\text{C}_5\text{FeN}_6\text{Na}_2\text{O} \cdot 2\text{H}_2\text{O}$ ) were purchased from Aladdin Chemistry Co. Ltd. sulfoxide-d<sub>6</sub> (DMSO-d<sub>6</sub>), Sulfanilamide, N-(1-Naphthyl) ethylenediamine dihydrochloride were purchased from Damas Beta Co. Ltd. All experiments were conducted using ultrapure water with a resistivity of 18.2 MΩ cm.

## Synthesis of Cu-NDC

Take Cu-NDC for example, solution A was prepared by dissolving 0.204 g of  $\text{Cu}(\text{NO}_3)_2 \cdot 3\text{H}_2\text{O}$  in 6 mL of deionized water. Solution B was obtained by dissolving 0.208 g of 2,6-Naphthalenedicarboxylic acid (NDC) in 24 mL of DMF. Meanwhile, 3.55 g of PVP was dissolved in 18 mL of deionized water under continuous stirring to form solution C. Subsequently, solution A was slowly poured into solution C and stirred for 10 min, followed by the addition of solution B and further stirring for 10 min. The resulting mixed solution was transferred into a Teflon-lined autoclave and heated at 100 °C for 24 h. After cooling to room temperature, the precipitates were washed with ultrapure water and ethanol twice using a high-speed centrifuge at 8000 rpm for 5 min. Finally, the product was vacuum-dried overnight at 80 °C to obtain the blue powder of Cu-NDC.

## Synthesis of Cu/M-NDC

The synthesis steps of Cu/Fe-NDC, Cu/Co-NDC, and Cu/Ni-NDC are the same as those for Cu-NDC, except for the addition of corresponding metal salts in solution A. Specifically, to prepare Cu/Fe-NDC, 0.204 g of  $\text{Cu}(\text{NO}_3)_2 \cdot 3\text{H}_2\text{O}$  and 0.0252 g of  $\text{FeCl}_2 \cdot 4\text{H}_2\text{O}$  were dissolved in 6 mL of deionized water to obtain solution A. Similarly, for Cu/Co-NDC and Cu/Ni-NDC, the additional metal precursors in solution A were replaced by 0.0369 g of  $\text{Co}(\text{NO}_3)_2 \cdot 6\text{H}_2\text{O}$  and 0.0368 g of  $\text{Ni}(\text{NO}_3)_2 \cdot 6\text{H}_2\text{O}$ , respectively.

## Material characterizations

Scanning electron microscopy (SEM) measurements were performed using an FEI Nova-450 instrument with an electron beam voltage at 10 kV. Energy dispersive X-ray spectroscopy (EDS) spectra and elemental mapping images were obtained by a FEI Talos S-FEG electron microscopy at 200 kV. Powder X-ray diffraction (XRD) patterns were obtained using a D/max-Ultima IV X-ray diffractometer. Raman spectra were collected using a Renishaw 2000 instrument. X-ray photoelectron spectroscopy (XPS) measurements were performed on a Thermo Scientific K-Alpha XPS instrument (Al K α source is 1486.6 eV).

## NO<sub>3</sub>RR tests

The NO<sub>3</sub>RR electrochemical tests were all performed in H-type electrolytic cells consisting of an anode chamber and a cathode chamber separated by a Nafion 117 membrane. 1 M KOH solution (70 mL) with and without 32.3 mM NO<sub>3</sub><sup>-</sup> (2000 ppm NO<sub>3</sub><sup>-</sup> concentration) were uniformly distributed in the cathode and anode chambers, respectively. All electrochemical tests are performed in a standard three-electrode system, along with a graphite

rod and Hg/HgO electrode as the reference electrode and counter electrode, respectively. The prepared working electrode should be activated by 300 cycles of the cyclic voltammetry (CV) at a scan rate of  $100 \text{ mV s}^{-1}$  to obtain stable curves. Linear sweep voltammetry (LSV) polarization curves were performed with a scan rate of  $10 \text{ mV s}^{-1}$ . The chronoamperometry (CA) was carried out at various potentials from  $-0.3$  to  $-0.8 \text{ V}$  vs. RHE for 20 min. All potentials were measured against the Hg/HgO reference electrode and converted to the RHE reference scale by  $E (\text{vs. RHE}) = E (\text{vs. Hg/HgO}) + 0.098 \text{ V} + 0.0592 \times \text{pH}$ .

### Determination of $\text{NH}_3$ concentration

The indophenol blue method was utilized to colorimetrically analyze the generated  $\text{NH}_3$ . Initially, the post-reaction cathodic electrolyte was sampled and diluted to 2 mL. Then, the coloring agents were successively mixed into the diluted sample: 2 mL of a coloring reagent (1 M NaOH mixed with 5 wt.% salicylic acid and 5 wt.% sodium citrate), 1 mL of 0.05 M NaClO, and 0.2 mL of 1 wt.% sodium nitroferricyanide. After being stored in the dark for 2 h, the mixture's absorbance at 655 nm was evaluated via UV-vis spectrophotometry. The exact  $\text{NH}_3$  amounts were calculated according to a standard calibration curve constructed using  $0.0\text{--}5.0 \mu\text{g/mL}$   $\text{NH}_4\text{Cl}$  standard solutions.

### Determination of $\text{NO}_3^-$ concentration

For  $\text{NO}_3^-$  quantification, a specific volume of the post-test electrolyte was initially diluted to 5 mL. Subsequently, 0.1 mL of 1 M HCl and 0.01 mL of 0.8 wt.% sulfamic acid were added to the dilution. Following a 30-min incubation in the dark, the sample was analyzed via UV-vis spectrophotometry. The final corrected absorbance was obtained using the formula:  $A = A_{220\text{nm}} - 2A_{275\text{nm}}$ . The precise  $\text{NO}_3^-$  concentrations were then derived based on a standard calibration curve constructed from  $\text{KNO}_3^-$  reference solutions ( $0.0, 1.0, 2.0, 2.5, 5.0, 10.0, 15.0, \text{ and } 20.0 \mu\text{g/mL}$  of  $\text{NO}_3^-$ ).

### Determination of $\text{NO}_2^-$ concentration

The colorimetric reagent was prepared by dissolving 2 g of p-aminobenzenesulfonamide and 1 g of N-(1-naphthyl)ethylenediamine dihydrochloride sequentially into an acidic mixture (25 mL deionized  $\text{H}_2\text{O}$  and 5 mL phosphoric acid). For  $\text{NO}_2^-$  detection, a fraction of the tested electrolyte was diluted to 5 mL, followed by the addition of 0.1 mL of the aforementioned reagent. After a 20-min color-developing incubation, the absorbance of the mixture was measured at 540 nm via UV-vis spectrophotometry. The  $\text{NO}_2^-$  content was calibrated against a standard curve derived from  $0.0\text{--}2.5 \mu\text{g/mL}$   $\text{NaNO}_2$  reference solutions.

### $^{15}\text{N}$ isotope-labeling experiment

To confirm the source of  $\text{NH}_3$  qualitatively, electrochemical experiments were conducted using Cu/Fe-NDC catalyst on  $^{14}\text{NO}_3^- + 1 \text{ M KOH}$  and  $^{15}\text{NO}_3^- (>98 \text{ atom}\%^{15}\text{N}, \geq 99\% \text{ purity}) + 1 \text{ M KOH}$  electrolytes for 20 min electrolysis at  $-0.60 \text{ V}$  (vs. RHE), respectively. The resulting solutions with and without electrolysis were respectively added with maleic acid and regulated to  $\text{pH } 1\text{--}2$  using hydrochloric acid (4 M). Then, 0.5 mL of the solution was mixed thoroughly with  $50 \mu\text{L}$  of DMSO- $d_6$  for  $^1\text{H}$  NMR (400 MHz, Avance NEO) tests. To quantify the  $^{14}\text{NH}_4^+$  yield after electrolysis of  $32.3 \text{ mMNO}_3^-$  ( $2000 \text{ ppmNO}_3^-$  concentration) at  $-0.60 \text{ V}$  (vs. RHE) for 20 min, a calibration curve from  $^1\text{H}$  NMR measurements was constructed using a series of  $^{14}\text{NH}_4\text{Cl}$  solutions with defined concentrations ( $2.5, 50, 100, 150$  and  $200 \text{ ppm}$ ) as standards. The peak area integral ratio of  $^{14}\text{NH}_4^+$  to maleic acid was positively correlated with the concentrations of  $^{14}\text{NH}_4^+$ .

## Calculation of the FE and Yield

The formation rates (mass-normalized yields) of the target product  $\text{NH}_3$  and the primary byproduct  $\text{NO}_2^-$  were calculated according to the following formulas:

$$\text{Yield}_{\text{NH}_3} = \frac{C_{\text{NH}_3} \times V}{t \times m} \quad (\text{Equation 1})$$

$$\text{FE} = \frac{8 \times F \times C_{\text{NH}_3} \times V}{M_{\text{NH}_3} \times Q} \quad (\text{Equation 2})$$

To evaluate the selectivity of electron utilization during the electrocatalytic process, the Faradaic efficiencies FEs for ammonia and nitrite were determined using the equations below:

$$\text{Yield}_{\text{NO}_2^-} = \frac{C_{\text{NO}_2^-} \times V}{t \times m} \quad (\text{Equation 3})$$

$$\text{FE} = \frac{2 \times F \times C_{\text{NO}_2^-} \times V}{M_{\text{NO}_2^-} \times Q} \quad (\text{Equation 4})$$

Where  $C_{\text{NH}_3}$  and  $C_{\text{NO}_2^-}$  denote the measured concentrations of ammonia and nitrite.  $V$ ,  $t$ , and  $m$  represent the electrolyte volume (70 mL), electrolysis time (20 min), and catalyst loading mass (1 mg), respectively.  $M_{\text{NH}_3}$  and  $M_{\text{NO}_2^-}$  are the corresponding molar masses.  $F$  is the Faraday constant ( $96485 \text{ C mol}^{-1}$ ),  $Q$  is the total charge (C), and 8 and 2 are the transferred electrons for forming  $\text{NH}_3$  and  $\text{NO}_2^-$ , respectively.

## Zn- $\text{NO}_3^-$ battery performance

Carbon paper/nickel foam mixed substrate loaded with catalysts ( $1 \text{ mg cm}^{-2}$ ) and Zn foil ( $7 \times 2.5 \times 0.2 \text{ cm}^3$ ) were used as the cathode and anode for the self-made zinc-nitrate battery, respectively. The battery that contains catholyte (1 M KOH+0.1 M  $\text{KNO}_3$ ) and anolyte (6.0 M KOH+0.2 M  $\text{Zn}(\text{CH}_3\text{COO})_2$ ) separated by a proton exchange membrane (Nafion 117). All corresponding electrochemical measurements were processed with CHI 760. The battery-related evaluation parameters are calculated as follows:

The power density  $P$ :  $P = I \times V$  (Equation 5)

where  $I$  is the dispatch current density;  $V$  is the dispatch voltage, respectively.

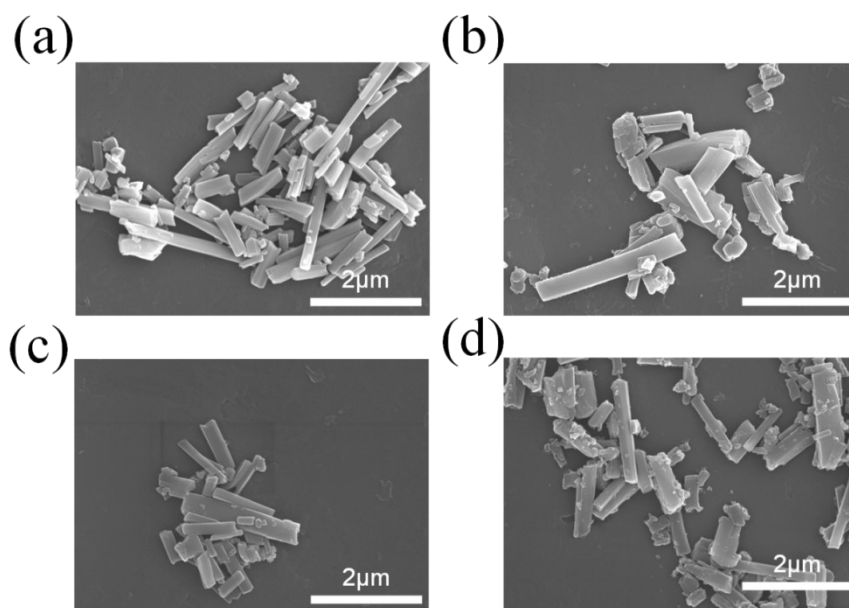

**Fig. S1.** SEM images of (a) Cu-NDC, (b) Cu/Ni-NDC, (c) Cu/Co-NDC, and (d) Cu/Fe-NDC.

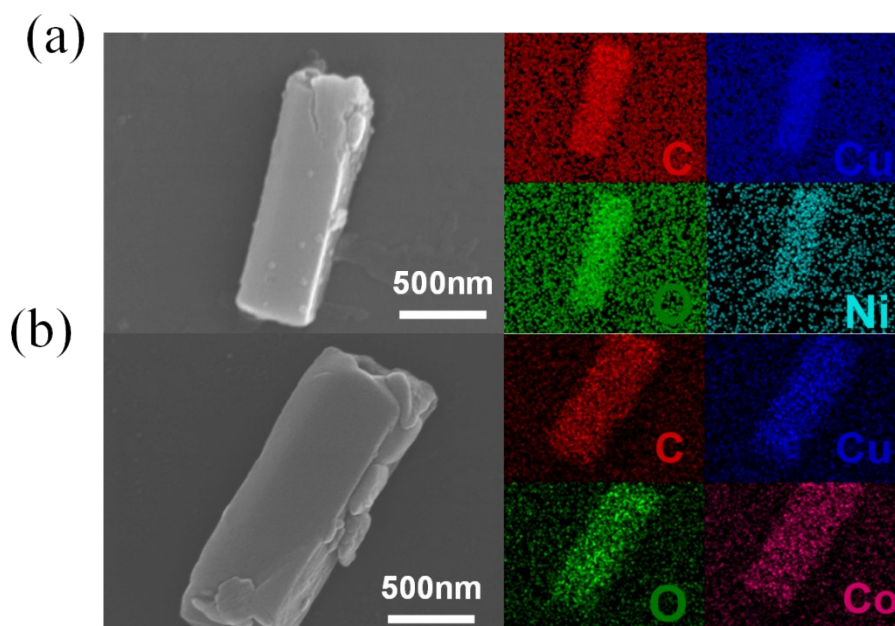

**Fig. S2.** SEM images and EDS mapping of (a) Cu/Ni-NDC and (b) Cu/Co-N.

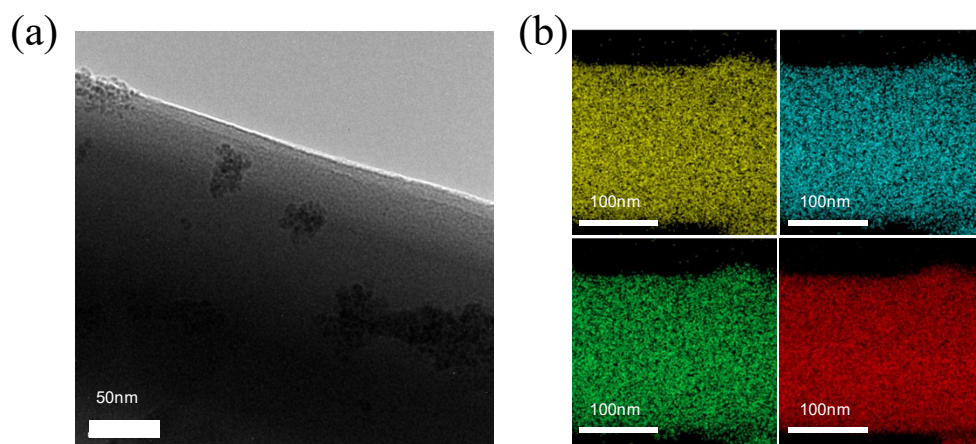

**Fig. S3.** (a) TEM image and (b) the EDS mapping of Cu/Fe-NDC.

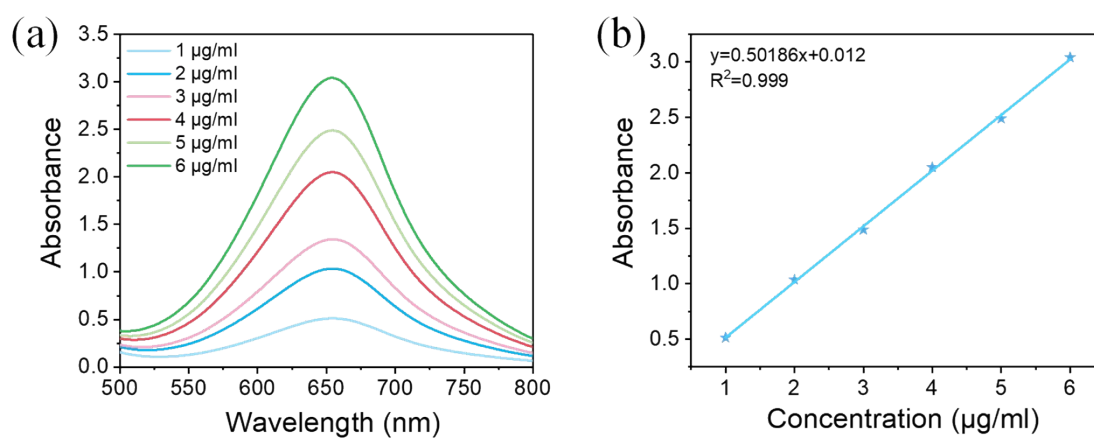

**Fig. S4.** Calibration of  $\text{NH}_3$  concentration using the indophenol blue method: (a) UV-vis spectra and (b) corresponding calibration curve.

A series of  $\text{NH}_4\text{Cl}$  standard solutions (1, 2, 3, 4, 5 and 6  $\mu\text{g}/\text{mL}$ ) were prepared by diluting a 100  $\mu\text{g}/\text{mL}$  stock solution to establish the calibration curve for ammonia determination.

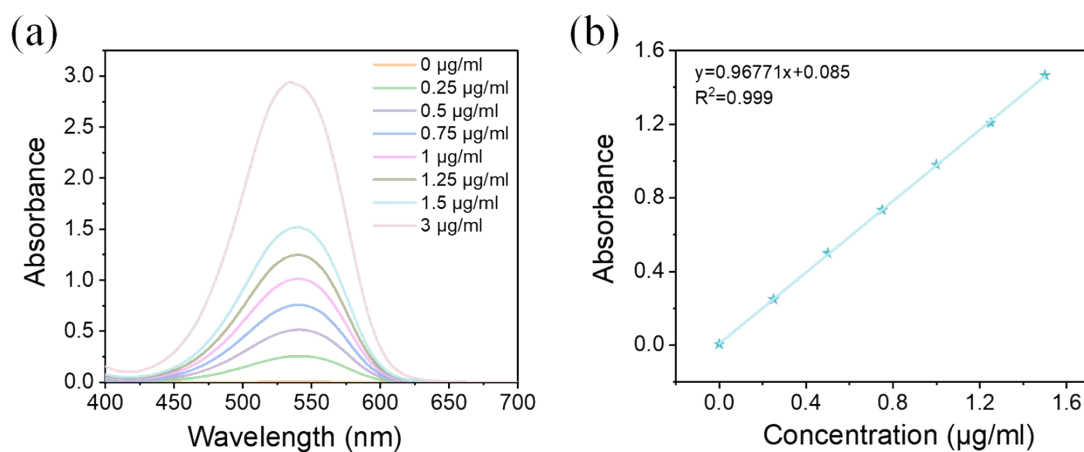

**Fig. S5.** Calibration of  $\text{NO}_2^-$  concentration using the indophenol blue method: (a) UV-vis spectra and (b) corresponding calibration curve.

Standard nitrite solutions (0.0, 0.25, 0.5, 0.75, 1.0, 1.25, 1.5, and 3  $\mu\text{g/mL}$ ) were prepared via serial dilution of a 100  $\mu\text{g/mL}$   $\text{NaNO}_2$  stock solution to establish the calibration for nitrite quantification.

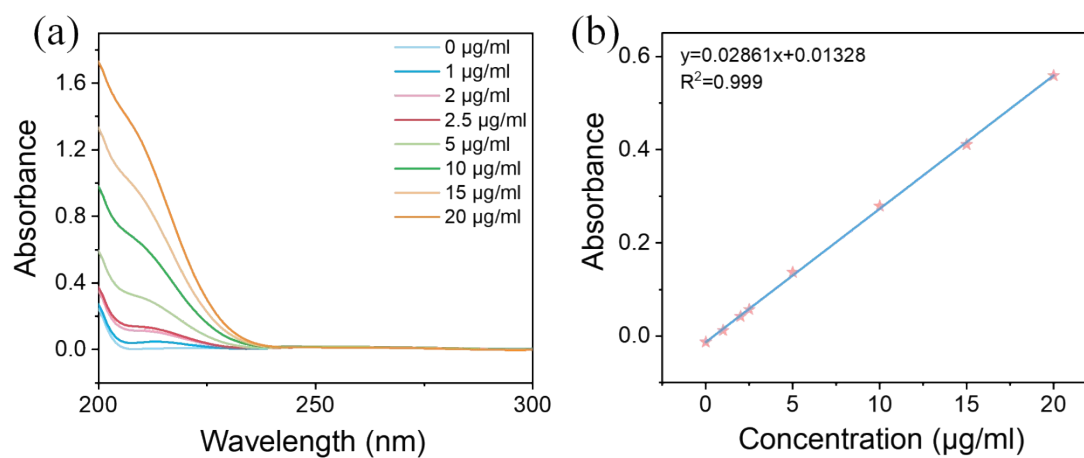

**Fig. S6.** Calibration of  $\text{NO}_3^-$  concentration using the indophenol blue method: (a) UV-vis spectra and (b) corresponding calibration curve.

Standard nitrate solutions (0.0, 1.0, 2.0, 2.5, 5.0, 10.0, 15.0, and 20.0  $\mu\text{g/mL}$ ) were derived from a 100  $\mu\text{g/mL}$   $\text{KNO}_3$  stock solution via serial dilution to establish the calibration for nitrate quantification.

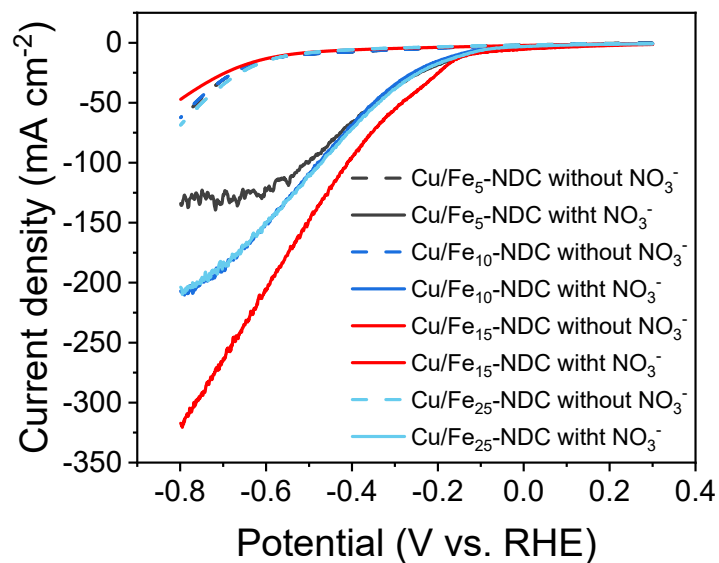

Fig. S7. LSV curves of Cu/Fe<sub>x</sub>-NDC with different Cu/Fe molar ratios in 1 M KOH with and without 0.1 M KNO<sub>3</sub>.

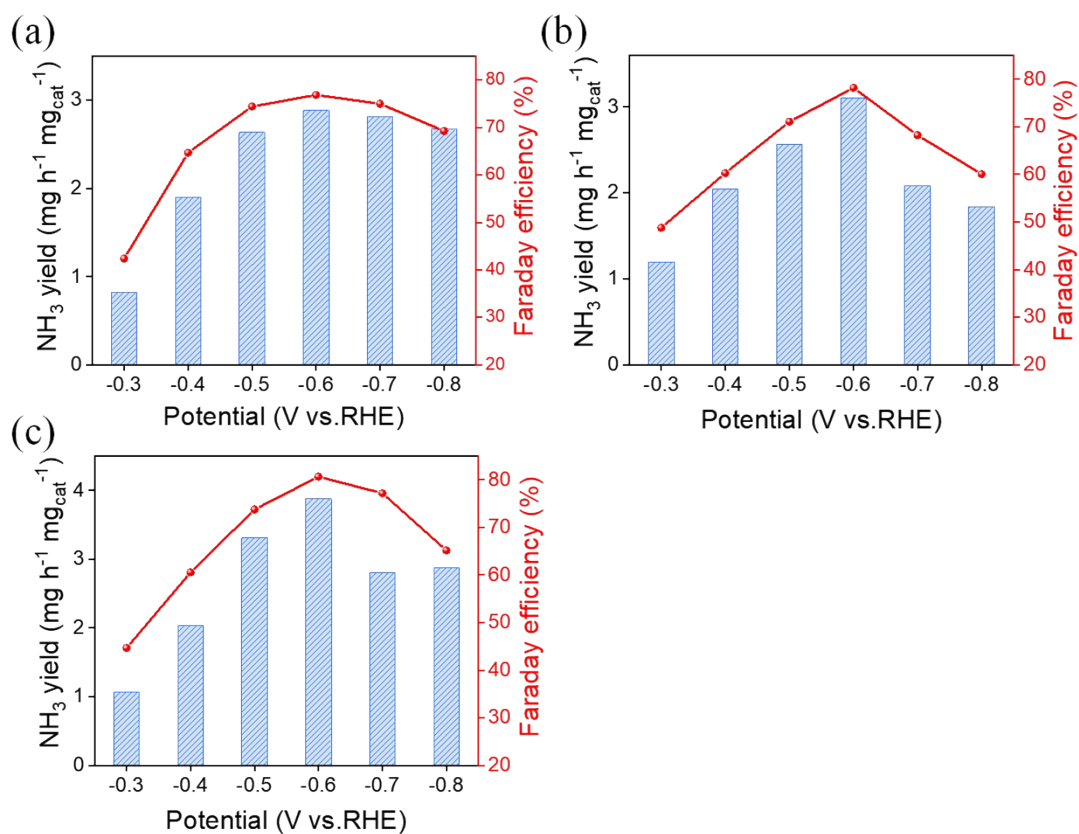

Fig. S8. Potential-dependent NH<sub>3</sub> yield and FE for (a) Cu-NDC, (b) Cu/Ni-NDC, and (c) Cu/Co-NDC.

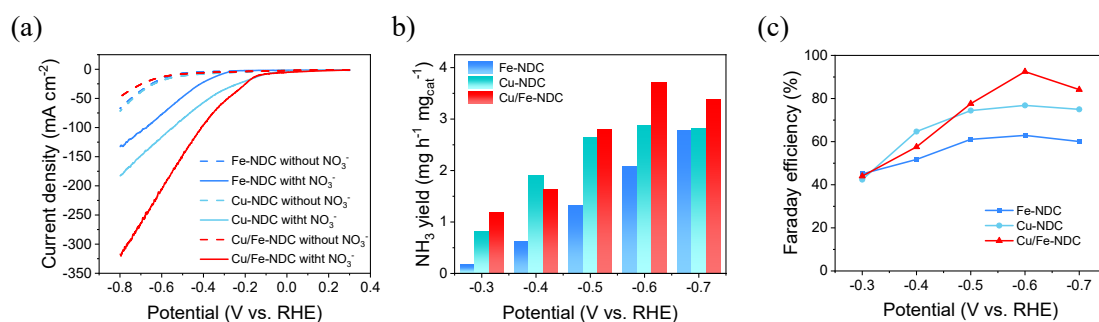

**Fig. S9.** Electrocatalytic NO<sub>3</sub>RR performance comparison of Fe-NDC, Cu-NDC, and Cu/Fe-NDC. (a) LSV curves in 1 M KOH with and without 0.1 M KNO<sub>3</sub>. (b) NH<sub>3</sub> yields and (c) Faradaic efficiencies at given potentials.

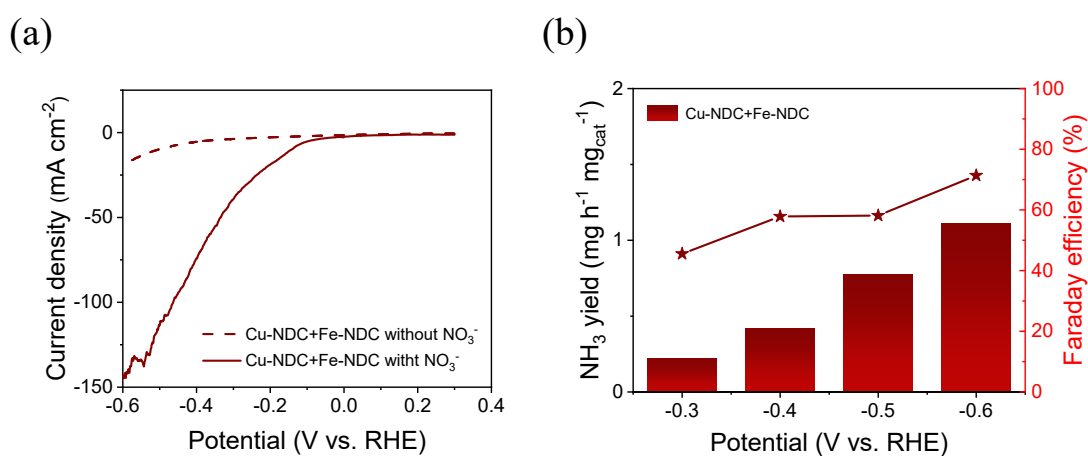

**Fig. S10.** NO<sub>3</sub>RR performance of physically mixed Cu-NDC+Fe-NDC. (a) LSV curves. (b) NH<sub>3</sub> yields and Faradaic efficiencies.

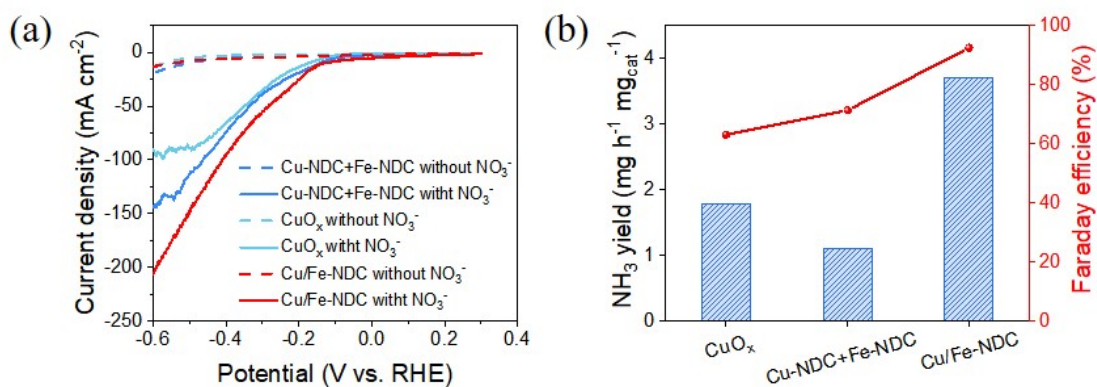

**Fig. S11.** Electrocatalytic NO<sub>3</sub>RR performance comparison. (a) LSV curves of the physically mixed Cu-NDC+Fe-NDC, the benchmark CuO<sub>x</sub>, and Cu/Fe-NDC in 1 M KOH with and without 0.1 M KNO<sub>3</sub>. (b) Corresponding NH<sub>3</sub> yields and Faradaic efficiencies at the optimal potential.

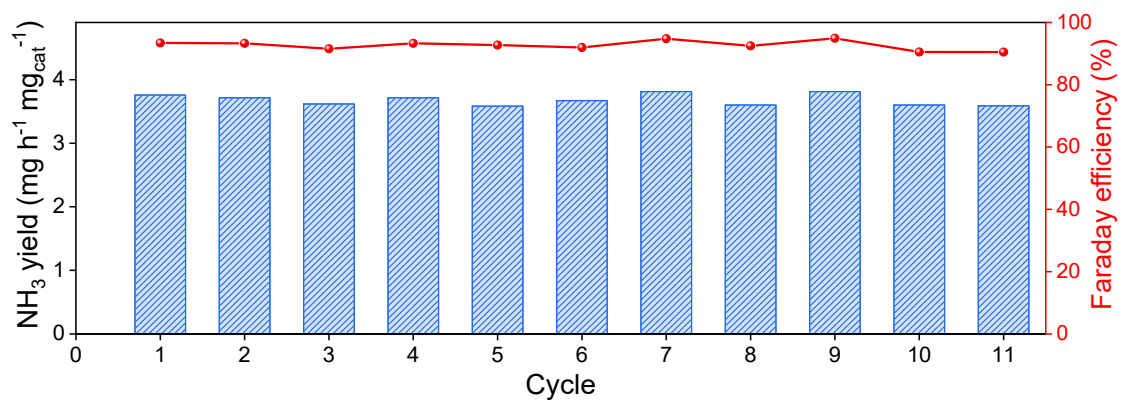

**Fig. S12.** Long-term electrocatalytic cycling stability of Cu/Fe-NDC for 11 cycles.

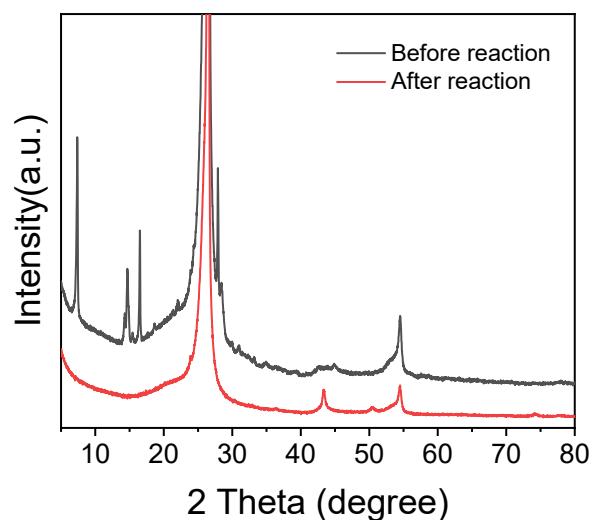

**Fig. S13.** XRD patterns of the Cu/Fe-NDC deposited on a carbon paper substrate before and after the NO<sub>3</sub>RR electrocatalytic test.

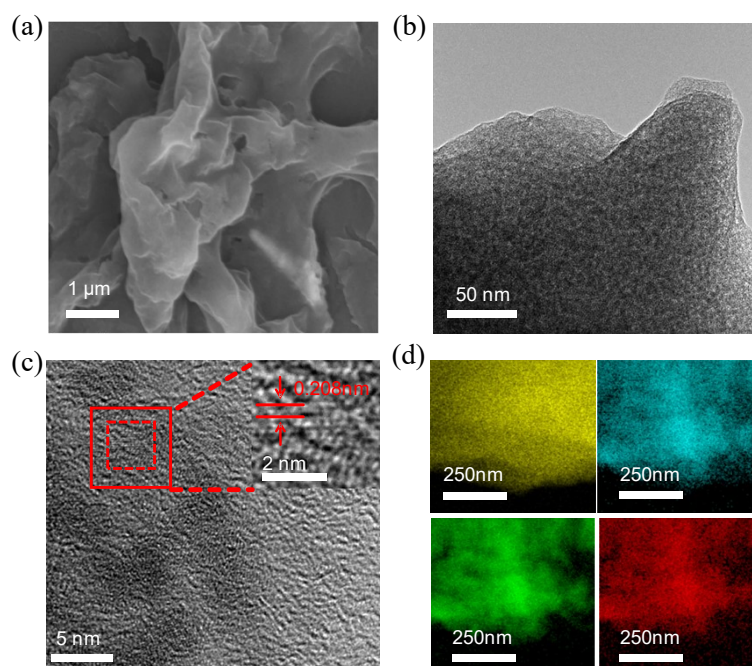

**Fig. S14.** Morphological and structural characterizations of the post-reaction Cu/Fe-NDC catalyst. (a) SEM, (b) TEM, and (c) HRTEM images. (d) EDS elemental mapping.

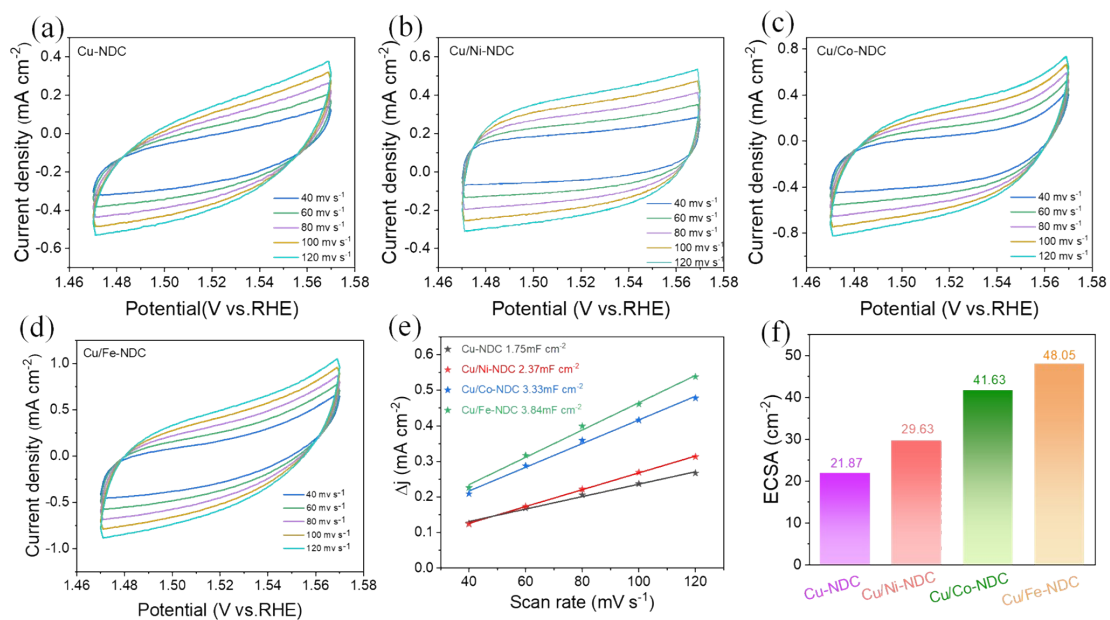

**Fig. S15.** ECSA evaluation: (a–d) CV curves at various scan rates and (e) linear fitting of current density; (f) calculated ECSA values. The determined ECSA values based on the equation of  $ECSA = Cdl/Cs \times A$ , where  $Cdl$  is the double-layer capacitance of catalyst,  $Cs$  is the capacitance of an atomically smooth planar surface ( $0.04 \text{ mF cm}^{-2}$  in alkaline Media), and  $A$  is the electrode geometric area.

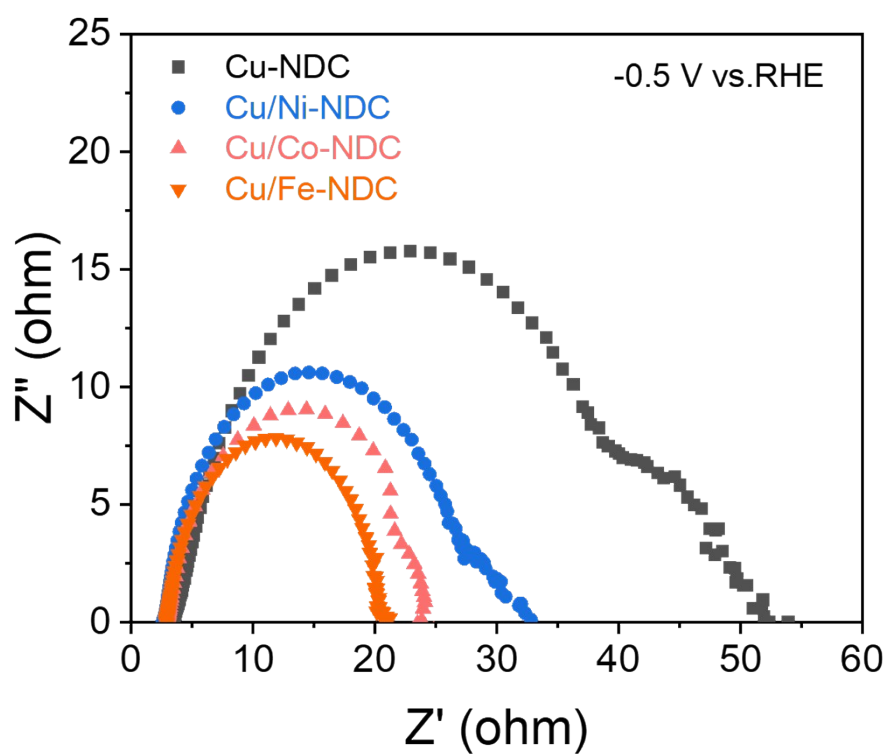

Fig. S16. EIS Nyquist plots of catalysts at  $-0.5$  V vs. RHE.

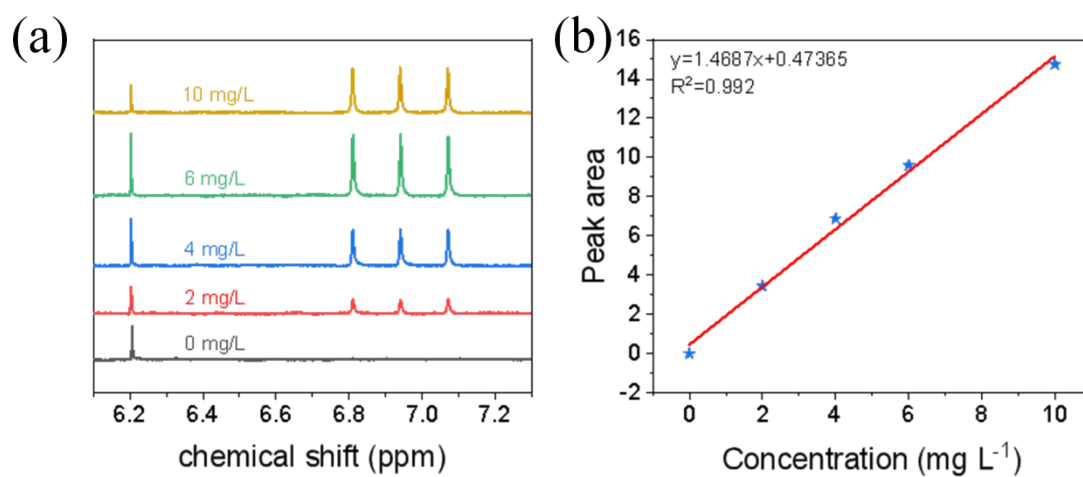

Fig. S17.  $^1\text{H}$  NMR spectra of electrolyte after  $^{15}\text{N}$ -labeling experiments.

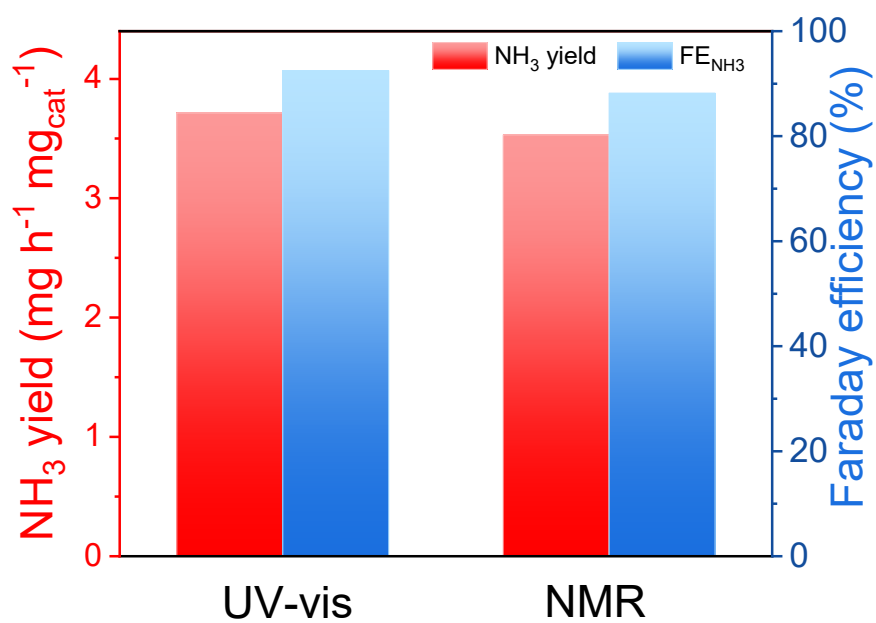

**Fig. S18.** Correlation between NH<sub>3</sub> yield/FE determined by UV-vis and <sup>1</sup>H NMR methods.

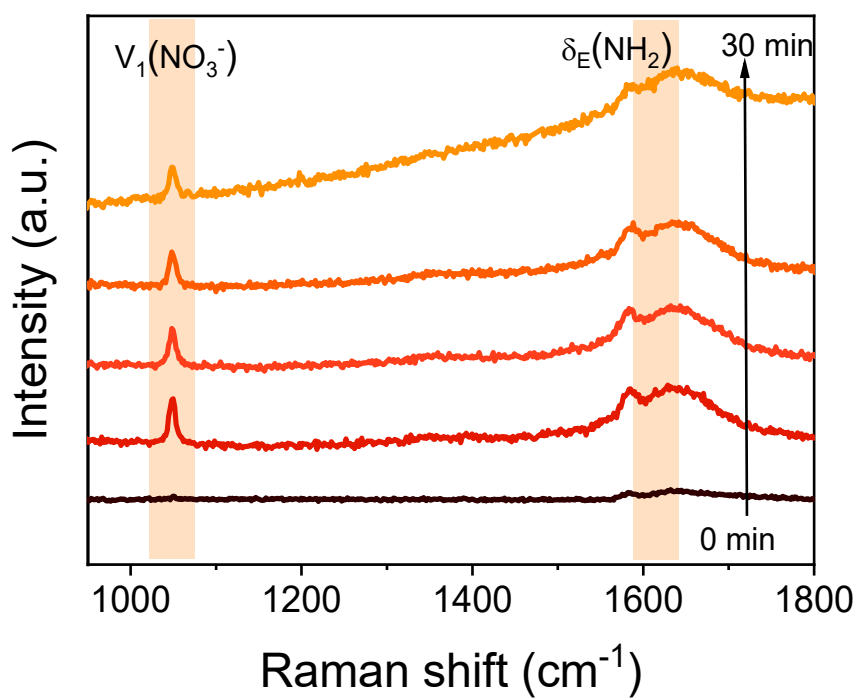

**Fig. S19.** Time-resolved operando Raman spectra of Cu/Fe-NDC under constant potential.

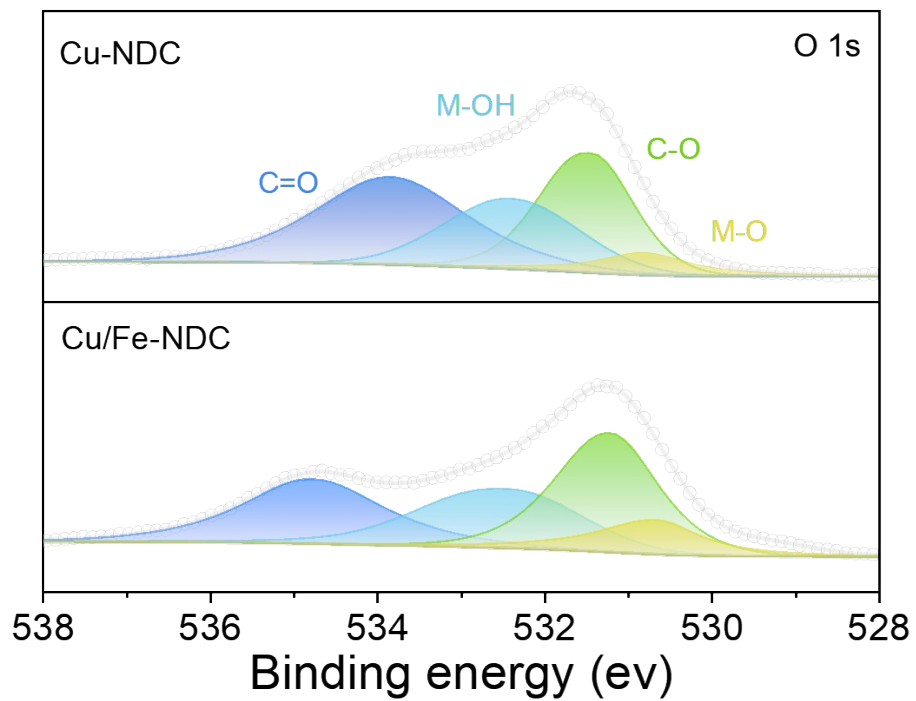

**Fig. S20.** High-resolution (a) C 1s, (b) O 1s, and (c) Co 2p XPS spectra of Cu/Co-NDC.

**Table S1.** Elemental composition of samples.

| Sample    | C(wt%) | O(wt%) | Cu(wt%) | M(wt%) |
|-----------|--------|--------|---------|--------|
| Cu-NDC    | 53.88  | 24.45  | 21.67   |        |
| Cu/Co-NDC | 57.95  | 21.69  | 17.89   | 2.5    |
| Cu/Ni-NDC | 57.76  | 24.01  | 17.11   | 1.12   |
| Cu/Fe-NDC | 49.63  | 21.81  | 25.99   | 2.57   |

<sup>a</sup>Measured by EDS; <sup>b</sup>measured by ICP-MS.

**Table S2.** The Zn-NO<sub>3</sub><sup>-</sup> battery performance comparison of electrode.

| Cathode                                      | OCV (V vs. Zn) | Power density (mW cm <sup>-2</sup> ) | Ref.      |
|----------------------------------------------|----------------|--------------------------------------|-----------|
| Cu/Fe-NDC                                    | 1.82           | 12.5                                 | This work |
| CoSb IMCs/C                                  | 1.28           | 11.88                                | [1]       |
| 15Cu-V <sub>2</sub> C MXene                  | 1.52           | 10.3                                 | [2]       |
| RuFe-NC                                      | 1.48           | 10.16                                | [3]       |
| 0.6W-O-CoP@NF                                | 0.7            | 9.27                                 | [4]       |
| Cu-RD-KOH                                    | 0.939          | 9.15                                 | [5]       |
| Cu <sub>3</sub> P@Co(OH) <sub>2</sub> /CF    | 0.86           | 5.16                                 | [6]       |
| Ni-MOF-Ru                                    | 1.42           | 4.99                                 | [7]       |
| HE-OH                                        | 1.38           | 3.62                                 | [8]       |
| Ag/Co <sub>3</sub> O <sub>4</sub> /CoOOH NMs | 1.32           | 2.56                                 | [9]       |
| NiCoP-VP                                     | 1.39           | 1.1                                  | [10]      |

## Reference

- [1]. C. Ma, H. Zhang, J. Xia, X. Zhu, K. Qu, F. Feng, S. Han, C. He, X. Ma, G. Lin, W. Cao, X. Meng, L. Zhu, Y. Yu, A.-L. Wang and Q. Lu, *J. Am. Chem. Soc.*, 2024, **146**, 20069-20079.
- [2]. W. Wang, J. Zou, B. Kui, X. Chen, Y. Shen, S. Zhao, G. Zhu, P. Gao and W. Ye, *J. Mater. Chem. A*, 2025, **13**, 35892-35901.
- [3]. L. Huang, P. Zhang, X. Ge, B. Wang, J. Yuan, W. Li, J. Zhang, B. Zhang, O. Hanay and L. Wang, *Nano-Micro Lett.*, 2026, **18**, 66.
- [4]. Z. Chang, G. Meng, Y. Chen, C. Chen, S. Han, P. Wu, L. Zhu, H. Tian, F. Kong, M. Wang, X. Cui and J. Shi, *Adv. Mater.*, 2023, **35**, 2304508.
- [5]. H. Jiang, G.-F. Chen, O. Savateev, J. Xue, L.-X. Ding, Z. Liang, M. Antonietti and H. Wang, *Angew. Chem. Int. Ed.*, 2023, **62**, e202218717.
- [6]. H. Jiang, J. Xue, L.-X. Ding, S. Han, G.-F. Chen and H. Wang, *Small Methods*, 2023, **7**, 2300021.
- [7]. X. Cai, J. Xu, Y. Yin, G. Qiao, W. Shen, G. Wang and Z. Jiao, *Adv. Funct. Mater.*, 2024, **34**, 2415174.
- [8]. M. Chen, X. Li, N. Liu, Z. Du, Z. Wang and J. Qi, *Chin. Chem. Lett.*, 2025, **36**, 111294.
- [9]. S. Wu, Y. Jiang, W. Luo, P. Xu, L. Huang, Y. Du, H. Wang, X. Zhou, Y. Ge, J. Qian, H. Nie and Z. Yang, *Adv. Sci.*, 2023, **10**, 2303789.
- [10]. J. Ye, A. Wang, Y. Yang, X. Qian, C. Wan, G. He and H. Chen, *Chem. Eng. J.*, 2024, **487**, 150434.
